1 **SARS-CoV-2 antibody response among COVID-19 patients is not affected by**  
2 **parasite co-infection**

3 Teklay Gebrecherkos<sup>1</sup>, Yazezew Kebede Kiros<sup>1</sup>, Feyissa Challa<sup>2</sup>, Atsbeha Gebreegzabher<sup>2</sup>, Saro  
4 Abdella<sup>2</sup>, Dereje Leta<sup>2</sup>, Abraham Desta<sup>3</sup>, Ataklti Hailu<sup>3</sup>, Geremew Tasew<sup>2</sup>, Mahmud Abdulkader<sup>1</sup>,  
5 Masresha Tessema<sup>2</sup>, Getachew Tollera<sup>2</sup>, Zekarias Gessesse Arefaine<sup>1</sup>, Henk HDF Schallig<sup>4</sup>, Britta  
6 C. Urban<sup>5</sup>, Tobias F. Rinke de Wit<sup>6,7</sup>, Dawit Wolday<sup>1,2</sup>

7 **Running title:** Antibody response in parasite co-infected SARS-CoV-2 patients

8 <sup>1</sup>Mekelle University College of Health Sciences, Mekelle, Ethiopia

9 <sup>2</sup>Ethiopian Public Health Institute, Addis Ababa, Ethiopia

10 <sup>3</sup>Tigray Health Research Institute, Mekelle, Ethiopia

11 <sup>4</sup>Department of Medical Microbiology, and Infection Prevention, Experimental Parasitology Unit,  
12 Amsterdam Institute for Infection and Immunity, Academic Medical Center at the University of  
13 Amsterdam, Amsterdam, The Netherlands

14 <sup>5</sup>Liverpool School of Tropical Medicine

15 <sup>6</sup>Amsterdam Institute Global Health and Development, Academic Medical Center, University of  
16 Amsterdam, Amsterdam, The Netherlands

17 <sup>7</sup>Joep Lange Institute, Amsterdam, The Netherlands.

18

19 **\*Correspondence:** Teklay Gebrecherkos. Department of Medical Microbiology and Immunology, CHS,  
20 MU, Ethiopia. Email: estiftg17@gmail.com

21

22

23

24

25

26

27

28

29

## 30 **Abstract**

31 **Background:** B-cell hypo-responsiveness has been associated with intestinal parasitic co-  
32 infection. The effect of parasite co-infection on antibody response to SARS-CoV-2 is unknown.  
33 Here, we aimed to determine antibody response to SARS-CoV-2 among COVID-19 patients co-  
34 infected with intestinal parasites and those without parasite co-infection.

35 **Methods:** In this prospective cohort study, a total of 589 samples were serially collected from 72  
36 RT-PCR-confirmed patients. Anti-SARS-CoV-2 nucleocapsid protein (NP) antibody titers were  
37 measured longitudinally during hospitalization. SARS-CoV-2 infection was confirmed by RT-PCR on  
38 samples obtained from nasopharyngeal swabs, while direct microscopic examination, modified Ritchie  
39 concentration, and Kato-Katz methods were used to identify parasites and ova from fresh stool samples.  
40 Data were analyzed using STATA version 14.

41 **Results:** Of the 72 COVID-19 patients, 39 (54.2%) were co-infected with intestinal parasites while  
42 33 (45.8%) had no parasitic co-infection. Overall, the median cut-off index (COI) for anti-NP  
43 antibody titer among COVID-19 patients co-infected with parasites was 6.91 (IQR: 0.55-40.7)  
44 compared to 7.51 (IQR: 0.21-59.21) in those without parasites ( $p=0.764$ ). In addition, 174/261  
45 [66.7% (95% CI: 60.68-72.16)] and 231/328 [70.4% (95% CI: 65.23-75.14)] specimens from COVID-  
46 19 patients with parasite co-infection and without parasites, respectively, had anti-SARS-CoV-2  
47 antibody above the cut-off COI value ( $p=0.328$ ). The positivity rate for anti-SARS-CoV-2 NP < 14  
48 days after symptom onset was 66.3% (95% CI: 60.21-71.85) and 70.0% (95% CI: 64.72-74.74) for  
49 those not infected and co-infected with parasites, respectively ( $p=0.343$ ). In addition, 31/72  
50 (41.9%) of the patients who were negative at the time of enrollment were seroconverted. The  
51 trend in anti-NP antibodies among seroconverted individuals with and without parasites is also  
52 similar.

53 **Conclusions:** Co-infection with parasitic infection has very little effect on the anti-SARS-CoV-2  
54 antibody immune response. Further studies on the profile of neutralizing antibodies in parasite-  
55 endemic areas are warranted to ascertain vaccine efficacy.

56 **Keywords:** COVID-19, SARS-CoV-2, antibody, Ig, anti-NP antibody, parasite, helminth, protozoa

## 57 **Author's summary**

58 Pre-existing co-infection with intestinal parasites has been shown to diminish antibody response  
59 to a multitude of heterologous pathogens or vaccines. However, the effect of parasite co-  
60 infection on antibody response to SARS-CoV-2 is unknown. We determined the anti-nucleocapsid  
61 protein (NP) antibody response to SARS-CoV-2 among COVID-19 patients co-infected with  
62 intestinal parasites and compared their response to those without parasites. There was no  
63 difference in anti-NP positivity rate, seroconversion, or titer level among COVID-19 patients with  
64 or without parasitic co-infection. Further studies on the profile of neutralizing antibodies in  
65 parasite-endemic areas are warranted to ascertain vaccine efficacy.

## 66 **Introduction**

67 Antibody testing for severe acute respiratory syndrome coronavirus-2 (SARS-CoV-2) is used for  
68 epidemiological surveillance, in aiding the diagnosis of (previous) coronavirus disease 2019  
69 (COVID-19), and in the assessment of herd immunity following natural infection or after vaccine  
70 administration [1-9]. Several reports have demonstrated a lack of specificity for SARS-CoV-2  
71 antibodies in evaluations of samples both pre-pandemic as well as samples collected during the  
72 COVID-19 pandemic period [10-18]. Such samples derived from parasite-endemic areas may  
73 cross-react to some of the SARS-CoV-2 antigenic epitopes [19, 20]. On the other hand, antibody  
74 response, including neutralizing antibody titers may be influenced in individuals with profound  
75 immune suppression, such as HIV-1 [21], though others have not demonstrated such effects [22,  
76 23].

77 B-cell hypo-responsiveness is associated with intestinal parasite co-infection in endemic areas  
78 [24]. Indeed, pre-existing co-infection with parasites has been shown to diminish antibody  
79 response to influenza, hepatitis B, pneumococcal, cholera, tetanus, and malarial vaccines [25-  
80 31].

81 Nonetheless, the effect of parasite co-infection on antibody response to SARS-CoV-2 among  
82 COVID-19 patients remains to be elucidated. In addition, seroconversion might also be reduced  
83 or delayed in SARS-CoV-2-infected patients with pre-existing parasite co-infection. Here, we

84 determined whether pre-existing co-infection with parasites impacts SARS-CoV-2 antibody  
85 responses and seroconversion.

## 86 **Materials and Methods**

### 87 **Study design, period, and setting**

88 The study is part of the ongoing Profile-Cov study, a prospective observational cohort study in  
89 Ethiopia with rapid diagnostic profiling of SARS-CoV-2 in the context of persistent immune  
90 activation (Clinicaltrials.gov: NCT04473365). Consecutive patients with confirmed Real-Time  
91 polymerase chain reaction (RT-PCR) test results were enrolled. They were recruited from Mekelle  
92 University College of Health Sciences (Kuyha COVID-19 Isolation and Treatment Center), Mekelle  
93 City, Northern Ethiopia, prospectively between July 15 and October 28, 2020.

94 Individuals presenting to the Isolation and Treatment Center were screened for SARS-CoV-2  
95 infection with a nasopharyngeal swab and an RT-PCR confirmed patients. Following the  
96 declaration by the WHO that COVID-19 has become a pandemic, the Ethiopian Ministry of Health  
97 implemented a mass screening of all travelers, people who had come in contact with COVID-19  
98 patients, those from high-risk settings (e.g. healthcare workers), as well as those with symptoms  
99 and signs suggestive of SARS-CoV-2 infection [32]. All cases with a confirmed SARS-CoV-2  
100 infection were admitted to dedicated COVID-19 Isolation and Treatment Centers. Patients were  
101 admitted irrespective of clinical severity status. Whenever patients progress to severe or critical  
102 COVID-19, they were admitted to the intensive care unit (ICU). None of the patients received  
103 SARS-CoV-2 vaccination as they were enrolled before the introduction of a vaccine to the country.

### 104 **Data and specimen collection**

105 Sociodemographic, clinical data, and laboratory data were collected using standardized Case  
106 Record Forms (CRFs) adapted from the International Severe Acute Respiratory and Emerging  
107 Infection Consortium's (ISARIC) CRFs for emerging severe acute respiratory infections [33]. All  
108 data were then entered onto electronic medical records.

109 For analysis of anti-NP antibody kinetics, samples were drawn serially from 72 SARS-CoV-2  
110 RT-PCR-confirmed patients. Overall, patients were followed for a median of 31 [interquartile

111 range (IQR): 17-32] days, and ranging between 7 to 37 days. Whenever possible, samples were  
112 drawn every 3 days during follow-up. Thus, multiple samples were drawn per individual at a given  
113 time interval (0–3, 4–6, 7–9, 10–12, 13–15, 16–18, 19–21, 22–24, 25–27, 28–30, 31–33, 34–36,  
114 37–39, and  $\geq 40$  days after onset of symptoms). Notably, only one sample per time interval was  
115 included from a single participant. Specimens were immediately transported to the Central  
116 Laboratory of the university hospital, and separated plasma was frozen at  $-80^{\circ}\text{C}$  until further  
117 analysis.

### 118 **Laboratory assays**

119 SARS-CoV-2 infection was confirmed by RT-PCR on samples obtained from nasopharyngeal  
120 swabs, as described previously [32]. The antibody profile in this study was determined using the  
121 Roche Elecsys electrochemiluminescent immunoassay (ECLIA) that targets the nucleocapsid  
122 protein (NP). Testing, including the cut-off index (COI) for anti-NP total immunoglobulin (Ig) titer was  
123 done following the manufacturer's instructions, as described previously [34]. Seroconversion was  
124 ascertained if a patient with a negative antibody test at the time of enrollment becomes positive  
125 with the assays tested during follow-up. For estimating the day of seroconversion, the day's post-  
126 symptom onset was determined for symptomatic cases. For asymptomatic patients, we added 6  
127 days (median time between symptom onset and date of positive PCR testing among symptomatic  
128 cases) to the PCR testing date. Fresh stool sample specimens were also obtained for examination  
129 for parasites and ova. The analysis included direct microscopic examination, modified Ritchie  
130 concentration method, and Kato-Katz method, as described previously [35].

### 131 **Statistical Analysis**

132 Baseline characteristics for continuous variables were expressed as the median with IQR, and for  
133 categorical variables as proportions. Categorical variables were compared using Fisher's exact  
134 test or  $\chi^2$  test, and continuous variables were compared by Mann–Whitney U or Kruskal–Wallis  
135 tests as appropriate. The primary outcomes for this study were anti-NP total Ig positivity rate or  
136 titers above the COI value, according to sampling time (days after symptom onset). The positivity  
137 rate was presented as proportion and 95% confidence interval (CI) limits. Data were analyzed  
138 using STATA (Statistical package v. 14.0, StataCorp, Texas, USA).

139 **Ethical considerations**

140 Participants provided written informed consent to participate in the Profile-Cov study. The study  
141 protocol was reviewed and approved by the Health Research Ethics Review Committee (HRERC)  
142 of Mekelle University College of Health Sciences (#ERC 1769/2020). Written informed consent  
143 was obtained from all study participants. However, specimens used as controls from pre-  
144 pandemic period were specimens from biobank and individual study participant consent was not  
145 obtained. Nonetheless, all personal identifiers were-linked from the sources, and the HRERC has  
146 reviewed and approved it.

147

148 **Results**

149 ***General characteristics***

150 Detailed demographic and clinical characteristics of the cohort have been described previously  
151 in detail in our published articles [34, 35]. For this sub-study, 72 PCR-confirmed COVID-19  
152 patients were enrolled and contributed a total of 589 samples [median of 9 (IQR: 5 – 11) paired  
153 samples per patient] collected serially over time. Of the 72 COVID-19 patients, 39 (54.2%) were  
154 co-infected with intestinal parasites while 33 (45.8%) had no parasitic co-infection. Details in  
155 sociodemographic characteristics and prevalence of parasite co-infection are summarized in  
156 **Table 1**. Frequent symptoms were fever, dyspnoea, cough, and headache. Except for dyspnoea  
157 which was significantly higher among those without parasites, clinical symptoms were similar in  
158 both groups. In addition, the groups did not differ by age, sex, comorbidities, or severity.

159 ***Longitudinal SARS-CoV-2 antibody response***

160 The overall antibody NP total Ig response is summarized in **Table 2**. A total of 589 specimens  
161 derived at different time points were evaluated. The overall positivity rate for anti-SARS-CoV-2  
162 NP total Ig was 68.8% (95% CI: 65.01-72.51); 70.4% (95% CI: 65.46-75.39) for those infected with  
163 parasites and 66.7% (95% CI: 60.91-72.42) for those not co-infected with parasites (p=0.328).  
164 Additionally, the positivity rate was 69.7% (95% CI: 62.61-76.78) for those infected with  
165 helminths and 68.4% (95% CI: 63.95-72.84) for those not co-infected with helminths (p=0.760).

166 Whereas the anti-SARS-CoV-2 NP total Ig was 68.8% (95% CI: 65.01-72.51) among those infected  
167 with protozoa, it was 67.4% (95% CI: 62.62-72.13) among those without protozoa ( $p=0.333$ ).  
168 Moreover, we did not observe differences in the anti-NP total Ig titers between those infected  
169 with parasites and those without parasite co-infection (**Table 2**).

170 The kinetics of the anti-NP total Ig response are shown in **Figure 1**. The seropositivity rate was  
171 low at the time of enrollment in the study. Overall the positivity rate for anti-NP total Ig was  
172 11.1% in those co-infected with parasites and 14.3% in those without parasites (**Figure 1A**).  
173 Similar trends were observed among those with or without helminth (**Figure 1B**), or with or  
174 without protozoa (**Figure 1C**). However, during the first 15 days after the onset of symptoms, the  
175 positivity rate increased significantly reaching above 50% positivity rate, irrespective of parasite  
176 co-infection status. During the period 2- to 3 weeks after the onset of symptoms, the positivity  
177 rate of all the assays was increased, ranging between 67.3% and 81.3%. Between 3 and 6 weeks  
178 after the onset of symptoms, the positivity rate continued to increase for all the assays, ranging  
179 from 84.6% to 90.9%. Positive anti-NP total Ig titer was detectable (i.e.  $COI \geq 1.0$ ) as early as 7 to  
180 12 days after onset of symptoms for all patients (**Figure 1D–F**). Because of the small sample size,  
181 we did not determine trends stratified by severity status.

### 182 ***Seroconversion of SARS-CoV-2 antibodies***

183 Patients who were antibody–negative at the time of enrollment in the study, but who became  
184 antibody–positive during follow–up were considered seroconverters. Overall, a total of 31  
185 (41.9%) were seroconverted. A total of 256 sample pairs were evaluated. Seroconversion trends  
186 are shown in **Figure 2**. Patients started to seroconvert as early as 4 to 9 days after the onset of  
187 symptoms, reaching around 25%. The rate of seroconversion within the first 15 days after the  
188 onset of symptoms increased to 44.4%. During the same period, the rate of seroconversion for  
189 those with parasites was 47.1% (95% CI: 20.61-76.94), and for those without parasitic co-  
190 infection was 40.0% (95% CI: 3.06-76.94), and the difference was not statistically significant  
191 ( $p=0.722$ ). In addition, the seroconversion rate increased further during 2- to 3 weeks after the  
192 onset of symptoms, ranging between 61.5% and 68.0%, respectively. The seroconversion rate  
193 continued to increase reaching 100% after  $\geq 39$  days of symptom onset in all groups (**Figure 2A**).

194 Trends in anti-NP total Ig titers were also similar in patients irrespective of the presence of  
195 parasite co-infection or not (**Figure 2B**). Whereas the median seroconversion time for those with  
196 parasites was 13 (IQR: 7-21) days, it was 15 (IQR: 10-16) days for those without parasitic co-  
197 infection ( $p=0.927$ ). Overall, there was no difference in seroconversion trend between those who  
198 were co-infected with parasites and those without parasites. Due to the small sample size,  
199 however, we did not do an analysis stratified by helminths and protozoa.

## 200 **Discussion**

201 In this study, we determined antibody responses among SARS-CoV-2 patients co-infected with  
202 parasites. To the best of our knowledge, this report is the first to determine the longitudinal  
203 SARS-CoV-2 antibody response in COVID-19 patients also co-infected with intestinal parasites.  
204 SARS-CoV-2 patients with parasite co-infection did not exhibit different profiles in antibody  
205 response or seroconversion patterns.

206 Several reports have previously documented that parasites downregulate antibody responses to  
207 heterologous pathogen and vaccine responses [25-31]. Likewise, we expected an impaired  
208 antibody response to SARS-CoV-2 among COVID-19 patients co-infected with parasites [24].  
209 Given the presence of a high level of cross-reactivity between SARS-CoV-2 and parasites [10-20],  
210 the expected reduction in antibody response might have been compensated by the presence of  
211 cross-reacting antibodies also in patients with COVID-19. Furthermore, it has been demonstrated  
212 that a reduced frequency of SARS-CoV-2-reactive CD4+ T helper cells without an effect on the  
213 expression of SARS-CoV-2-reactive CD8+ T cells [36]. Thus, it is plausible to postulate that  
214 parasite-induced reduced CD4+ T helper cells do not affect anti-NP antibody responses to SARS-  
215 CoV-2.

216 The strength of the current study is the use of longitudinal samples derived from the same  
217 patient. However, limitations include smaller sample sizes and a lack of determination of  
218 neutralizing antibody titers. In addition, anti-NP antibody response has not been stratified by  
219 severity status, though in our set-up we did not find differences in antibody profile by severity  
220 status [34].



221 The impact of parasite co-infection on the efficacy of SARS-CoV-2 vaccines in endemic areas is  
222 unknown [37]. Unraveling the differential antibody response profile between individuals with the  
223 parasite and those without parasite co-infection may have implications in the development and  
224 interpretation of diagnostic tools as well as the monitoring of vaccines in parasite-endemic areas.  
225 Further studies are needed to investigate the effects of co-infection with parasites on the efficacy  
226 and durability of antibody responses to SARS-CoV-2 vaccines.

227 **Informed Consent Statement:** Written informed consent was obtained from all study  
228 participants. All personal identifiers were de-linked from the sources.

229 **Acknowledgments:** The investigators thank EDCTP for providing funding to the project, COVID-  
230 19 patients and all individuals who provided specimens for control, and the medical staff who  
231 provided care of the patients.

232

## 233 **References**

- 234 1. Gudbjartsson DF, Norddahl GL, Melsted P, Gunnarsdottir K, Holm H, Eythorsson E, et al.  
235 Humoral immune response to SARS-CoV-2 in Iceland. *N Engl J Med* 2020; 383:1724 -1734.
- 236 2. Pollan M, Perez-Gomez B, Pastor-Barriuso R, Oteo J, Hernán MA, Pérez-Olmeda M, et al.  
237 Prevalence of SARS -CoV -2 in Spain (ENE -COVID): a nationwide, population-based  
238 seroepidemiological study. *Lancet* 2020; 396:535-544.
- 239 3. Wajnberg A, Mansour M, Leven E, Bouvier NM, Patel G, Firpo-Betancourt A, et al. Humoral  
240 response and PCR positivity in patients with COVID -19 in the New York City region, USA: an  
241 observational study. *Lancet Microbe* 2020; 1: e283-e289.
- 242 4. Long QX, Liu BZ, Deng HJ, Wu GC, Deng K, Chen YK, et al. Antibody responses to SARS-CoV-2  
243 in patients with COVID-19. *Nat Med* 2020; 26:845-848.
- 244 5. Okba NMA, Müller MA, Li W, Wang C, GeurtsvanKessel CH, Corman VM, et al. Severe acute  
245 respiratory syndrome coronavirus 2-specific antibody responses in coronavirus disease 2019  
246 patients. *Emerg Infect Dis* 2020; 26: 1478–1488.

- 247 6. Zhao J, Yuan Q, Wang H, Liu W, Liao X, Su Y, et al. Antibody responses to SARS-CoV-2 in  
248 patients of novel coronavirus disease 2019. *Clin Infect Dis* 2020; 71: 2027-2034.
- 249 7. Yongchen Z, Shen H, Wang X, Shi X, Li Y, Yan J, et al. Different longitudinal patterns of nucleic  
250 acid and serology testing results based on disease severity of COVID-19 patients. *Emerg*  
251 *Microbes Infect.* 2020; 9: 833-836.
- 252 8. Rijkers G, Murk JL, Wintermans B, van Looy B, van den Berge M, Veenemans J, et al.  
253 Differences in antibody kinetics and functionality between severe and mild severe acute  
254 respiratory syndrome coronavirus 2 infections. *J Infect Dis* 2020; 222:1265-1269.
- 255 9. Margolin E, Burgers WA, Sturrock ED, Mendelson M, Chapman R, Douglass N, et al. Prospects  
256 for SARS-CoV-2 diagnostics, therapeutics and vaccines in Africa. *Nat Rev Microbiol* 2020; 18:  
257 690-704.
- 258 10. Steinhardt LC, Ige F, Iriemenam NC, Greby SM, Hamada Y, Uwandu M, et al. Cross-reactivity  
259 of two SARS-CoV-2 serological assays in a setting where malaria is endemic. *J Clin Microbiol*  
260 2021; 59: e0051421. doi:10.1128/JCM.00514-21
- 261 11. Vanroye F, Bossche DVD, Brosius I, Tack B, Esbroeck MV, Jacobs J. COVID-19 antibody  
262 detecting rapid diagnostic tests show high cross-reactivity when challenged with pre-  
263 pandemic malaria, schistosomiasis and dengue samples. *Diagnostics (Basel)*. 2021; 11: 1163.  
264 doi:10.3390/diagnostics11071163
- 265 12. Mveang Nzoghe A, Essone PN, Leboueny M, Maloupazoa Siawaya AC, Bongho EC, Mvoundza  
266 Ndjindji O, et al. Evidence and implications of pre-existing humoral cross-reactive immunity  
267 to SARS-CoV-2. *Immun Inflamm Dis* 2021; 9: 128-133. doi:10.1002/iid3.367
- 268 13. Baker OR, Grabowski MK, Galiwango RM, Nalumansi A, Serwanga J, Clarke W, et al.  
269 Differential performance of CoronaCHEK SARS-CoV-2 lateral flow antibody assay by  
270 geographic origin of samples. *J Microbiol* 2021; doi:10.1101/2021.04.12.21255284
- 271 14. Tso FY, Lidenge SJ, Peña PB, Clegg AA, Ngowi JR, Mwaiselage J, et al. High prevalence of pre-  
272 existing serological cross-reactivity against severe acute respiratory syndrome coronavirus-2  
273 (SARS-CoV-2) in sub-Saharan Africa. *Int J Infect Dis* 2021; 102: 577-583.  
274 doi:10.1016/j.ijid.2020.10.104

- 275 15. Yadouleton A, Sander AL, Moreira-Soto A, Tchibozo C, Hounkanrin G, Badou Y, et al. Limited  
276 specificity of serologic tests for SARS-CoV-2 antibody detection, Benin. *Emerg Infect Dis* 2021;  
277 27: 233–237. doi:10.3201/eid2701.203281
- 278 16. Emmerich P, Murawski C, Ehmen C, von Possel R, Pekarek N, Oestereich L, et al. Limited  
279 specificity of commercially available SARS-CoV-2 IgG ELISAs in serum samples of African  
280 origin. *Trop Med Int Health* 2021; 26: 621-631. doi:10.1111/tmi.13569
- 281 17. Woodford J, Sagara I, Dicko A, Zeguime A, Doucoure M, Kwan J, et al. SARS-CoV-2 seroassay  
282 optimization and performance in a population with high background reactivity in Mali. *J Infect*  
283 *Dis* 2021; doi:10.1093/infdis/jiab498/6382154
- 284 18. Egwang TG, Owalla TJ, Okurut E, Apungia G, Fox A, De Carlo C, et al. Differential pre-pandemic  
285 breast milk IgA reactivity against SARS-CoV-2 and circulating human coronaviruses in  
286 Ugandan and American mothers. *Int J Infect Dis* 2021: S1201-9712(21)00747-5.  
287 doi:10.1016/j.ijid.2021.09.039
- 288 19. Hassan MM, Sharmin S, Hong J, Lee HS, Kim HJ, Hong ST. T cell epitopes of SARS-CoV-2 spike  
289 protein and conserved surface protein of *Plasmodium malariae* share sequence homology.  
290 *Open Life Sci.* 2021; 16:630-640. doi:10.1515/biol-2021-0062
- 291 20. Lapidus S, Liu F, Casanovas-Massana A, Dai Y, Huck JD, Lucas C, et al. *Plasmodium* infection  
292 induces cross-reactive antibodies to carbohydrate epitopes on the SARS-CoV-2 Spike protein.  
293 medRxiv [Preprint]. 2021 May 12; doi:10.1101/2021.05.10.21256855
- 294 21. Spinelli MA, Lynch KL, Yun C, et al. SARS-CoV-2 seroprevalence, and IgG concentration and  
295 pseudovirus neutralizing antibody titers after infection, compared by HIV status: a matched  
296 case-control observational study. *Lancet HIV* 2021. DOI: 10.1016/S2352-3018(21)00072-2.
- 297 22. Snyman J, Hwa SH, Krause R, Muema D, Reddy T, Ganga Y, et al. Similar antibody responses  
298 against SARS-CoV-2 in HIV-uninfected and infected individuals on antiretroviral therapy  
299 during the first South African infection wave. *Clin Infect Dis* 2021; Sep 2 [Epub ahead of print].  
300 doi:10.1093/cid/ciab758
- 301 23. Martín-Vicente M, Berenguer J, Muñoz-Gómez MJ, Díez C, Micán R, Pérez-Elías MJ, et al.  
302 Similar humoral immune responses against the SARS-CoV-2 spike protein in HIV and non-HIV  
303 individuals after COVID-19. *J Infect* 2021; 84:418-467. doi: 10.1016/j.jinf.2021.11.002

- 304 24. Wolday D, Ndungu FM, Gómez-Pérez GP, Rinke de Wit TF. Chronic immune activation and  
305 CD4+ T cell lymphopenia in healthy African individuals: Perspectives for SARS-CoV-2 vaccine  
306 efficacy. *Front Immunology* 2021; 12: 693269.
- 307 25. Kilian HD, Nielsen G. Cell-mediated and humoral immune response to tetanus vaccinations in  
308 onchocerciasis patients. *Trop Med Parasitol* 1989; 40:285–291.
- 309 26. Harris JB, Podolsky MJ, Bhuiyan TR, Chowdhury F, Khan AI, Larocque RC, Logvinenko T, et al.  
310 Immunologic responses to *Vibrio cholerae* in patients co-infected with intestinal parasites in  
311 Bangladesh. *PLoS Negl Trop Dis* 2009; 3:e403. doi:10.1371/journal.pntd.0000403
- 312 27. Esen M, Mordmüller B, de Salazar PM, Adegnika AA, Agnandji ST, Schaumburg F, Hounkpatin  
313 AB, et al. Reduced antibody responses against *Plasmodium falciparum* vaccine candidate  
314 antigens in the presence of *Trichuris trichiura*. *Vaccine* 2012; 30:7621–7624.  
315 doi:10.1016/j.vaccine.2012.10.026
- 316 28. Nono JK, Kamdem SD, Netongo PM, Dabee S, Schomaker M, Oumarou A, et al.  
317 Schistosomiasis Burden and Its Association With Lower Measles Vaccine Responses in School  
318 Children From Rural Cameroon. *Front Immunol* 2018; 9:2295.  
319 doi:10.3389/fimmu.2018.02295
- 320 29. Riner DK, Ndombi EM, Carter JM, et al. *Schistosoma mansoni* infection can jeopardize the  
321 duration of protective levels of antibody responses to immunizations against hepatitis B and  
322 tetanus toxoid. *PLoS Negl Trop Dis* 2016; 10:e0005180.
- 323 30. Apiwattanakul N, Thomas PG, Iverson AR, McCullers JA. Chronic helminth infections impair  
324 pneumococcal vaccine responses. *Vaccine* 2014; 32:5405–5410.  
325 doi:10.1016/j.vaccine.2014.07.107
- 326 31. Hartmann W, Brunn ML, Stetter N, Gagliani N, Muscate F, Stanelle-Bertram S, et al. Helminth  
327 infections suppress the efficacy of vaccination against seasonal influenza. *Cell Reports* 2019;  
328 29:2243–2256. doi:10.1016/j.celrep.2019.10.051
- 329 32. Abraha HE, Gessesse Z, Gebrecherkos T, Kebede Y, Weldegiargis AW, Tequare MH, et al.  
330 Clinical features and risk factors associated with morbidity and mortality among COVID-19  
331 patients in Northern Ethiopia. *Int J Infect Dis* 2021; 105: 776–783.

- 332 33. International Severe Acute Respiratory and Emerging Infection Consortium (ISARIC). COVID-  
333 19 CRF. [https://isaric.tghn.org/COVID-19- CRF/](https://isaric.tghn.org/COVID-19-CRF/). (Accessed Aug 28, 2020).
- 334 34. Gebrecherkos T, Kiros YK, Challa F, Abdella S, Gebreegzabher A, Leta D, et al. Longitudinal  
335 profile of antibody response to SARS-CoV-2 in patients with COVID-19 in a setting from Sub-  
336 Saharan Africa: A prospective longitudinal study. *PLoS One* 2022; 17:e0263627.  
337 doi:10.1371/journal.pone.0263627
- 338 35. Wolday D. Gebrecherkos T, Arefaine ZG, Kiros YK, Gebreegzabheer A, Tasew G, et al. Effect of  
339 co-infection with parasites on COVID-19 severity: A prospective cohort study.  
340 *eClinicalMedicine* 2021; 39: 101054. doi:10.1016/j.eclinm.2021.101054
- 341 36. Adjobimey T, Meyer J, Terkeš V, Parcina M, Hoerauf A. Helminth antigens differentially  
342 modulate the activation of CD4<sup>+</sup> and CD8<sup>+</sup> T lymphocytes of convalescent COVID-19 patients  
343 in vitro. *BMC Med* 2022;20: 241-252. doi:10.1186/s12916-022-02441-x
- 344 37. Egwang TG, Owalla TJ, Kemigisha M. COVID-19 vaccine trials must include helminth-infected  
345 cohorts. *Nat Immunol* 2022; 23:148. doi: 10.1038/s41590-021-01116-8

346

347

348

349

350

351

352

353

354

355

356

357

358

359

360

361 **Table 1: Clinical features among COVID-19 patients without, or with parasite co-infection**

| Characteristic                           | All patients<br>N=74 | Without parasite<br>N= 35 (47.3) | With parasite<br>N=39 (52.7) | p-value      |
|------------------------------------------|----------------------|----------------------------------|------------------------------|--------------|
| <b>Socio–demographic features:</b>       |                      |                                  |                              |              |
| Male sex                                 | 57 (77.0)            | 26 (75.3)                        | 31 (79.5)                    | 0.595        |
| Age in years (median, IQR)               | 35 (28-50)           | 37 (28-55)                       | 34 (28-43)                   | 0.368        |
| <b>Clinical symptoms:</b>                |                      |                                  |                              |              |
| Fever                                    | 23 (31.1)            | 12 (34.3)                        | 11 (28.2)                    | 0.573        |
| Dyspnea                                  | 30 (40.5)            | 19 (54.3)                        | 11 (28.2)                    | <b>0.023</b> |
| Cough                                    | 34 (46.0)            | 19 (54.3)                        | 15 (38.5)                    | 0.173        |
| Chest pain                               | 7 (9.5)              | 3 (8.6)                          | 4 (10.3)                     | 0.805        |
| Sore throat                              | 5 (6.8)              | 3 (8.6)                          | 2 (5.1)                      | 0.556        |
| Headache                                 | 21 (28.4)            | 13 (37.1)                        | 8 (20.5)                     | 0.113        |
| Nasal congestion                         | 5 (6.8)              | 1 (2.9)                          | 4 (10.3)                     | 0.205        |
| Loss of smell and/or taste               | 3 (4.1)              | 1 (2.9)                          | 2 (5.1)                      | 0.621        |
| Nausea/vomiting                          | 5 (6.8)              | 3 (8.6)                          | 2 (5.1)                      | 0.556        |
| Myalgia                                  | 8 (10.8)             | 4 (11.4)                         | 4 (10.3)                     | 0.871        |
| <b>Comorbidities</b>                     |                      |                                  |                              |              |
| <b>Comorbidity (at least 1)</b>          | 21 (28.4)            | 10 (28.6)                        | 11 (28.2)                    | 0.972        |
| Non–communicable diseases (NCDs)         | 18 (24.3)            | 8 (22.9)                         | 10 (25.6)                    | 0.780        |
| <b>Outcomes</b>                          |                      |                                  |                              |              |
| Severe COVID–19                          | 29 (39.2)            | 17 (48.6)                        | 12 (30.8)                    | 0.117        |
| Parasite co-infection                    | 39 (52.7)            | -                                | -                            | -            |
| Protozoa - any                           | 26 (35.1)            | -                                | -                            | -            |
| <i>Entamoeba spp. cyst</i>               | 18 (24.3)            | -                                | -                            | -            |
| <i>Entamoeba histolytica trophozoite</i> | 5 (6.8)              | -                                | -                            | -            |
| <i>Giardia lamblia trophozoite</i>       | 3 (4.1)              | -                                | -                            | -            |
| Helminth – any                           | 19 (25.7)            | -                                | -                            | -            |
| <i>Hymenolopis nana</i>                  | 15 (20.3)            | -                                | -                            | -            |
| <i>Schistosoma mansoni</i>               | 2 (2.7)              | -                                | -                            | -            |
| <i>Ascaris lumbricoides</i>              | 3 (4.1)              | -                                | -                            | -            |
| Poly–parasitism – any                    | 9 (12.2)             | -                                | -                            | -            |

362 \*Data are presented as proportion (%) unless indicated

363

364 **Table 2. Profile of anti-SARS-CoV-2 NP total Ig response among COVID-19 patients with or without intestinal parasite co-infection**

| Anti-NP total Ig*               | Parasite             |                      |         | Helminth             |                      |         | Protozoa             |                      |         |
|---------------------------------|----------------------|----------------------|---------|----------------------|----------------------|---------|----------------------|----------------------|---------|
|                                 | Negative             | Positive             | P-value | Negative             | Positive             | P-value | Negative             | Positive             | P-value |
| Positivity rate                 | 174/261<br>(66.7)    | 231/328<br>(70.4)    | 0.328   | 290/424<br>(68.4)    | 115/165<br>(69.7)    | 0.760   | 254/377<br>(67.4)    | 151/212<br>(71.2)    | 0.333   |
| Anti-NP total Ig titer<br>(COI) | 7.51<br>(0.21-59.21) | 6.91<br>(0.55-40.70) | 0.764   | 6.84<br>(0.28-48.99) | 7.49<br>(0.58-42.35) | 0.676   | 7.51<br>(0.23-50.57) | 6.79<br>(0.62-39.86) | 0.737   |

365 Data presented as numbers and percentage positivity rate, or median (IQR) cut-off index (COI). The COI for positive anti-NP total Ig is  $\geq 1.0$ .

366

367

368

369

370

371

372

373

374

375

376

377

378

379

380

381 Figure legends:

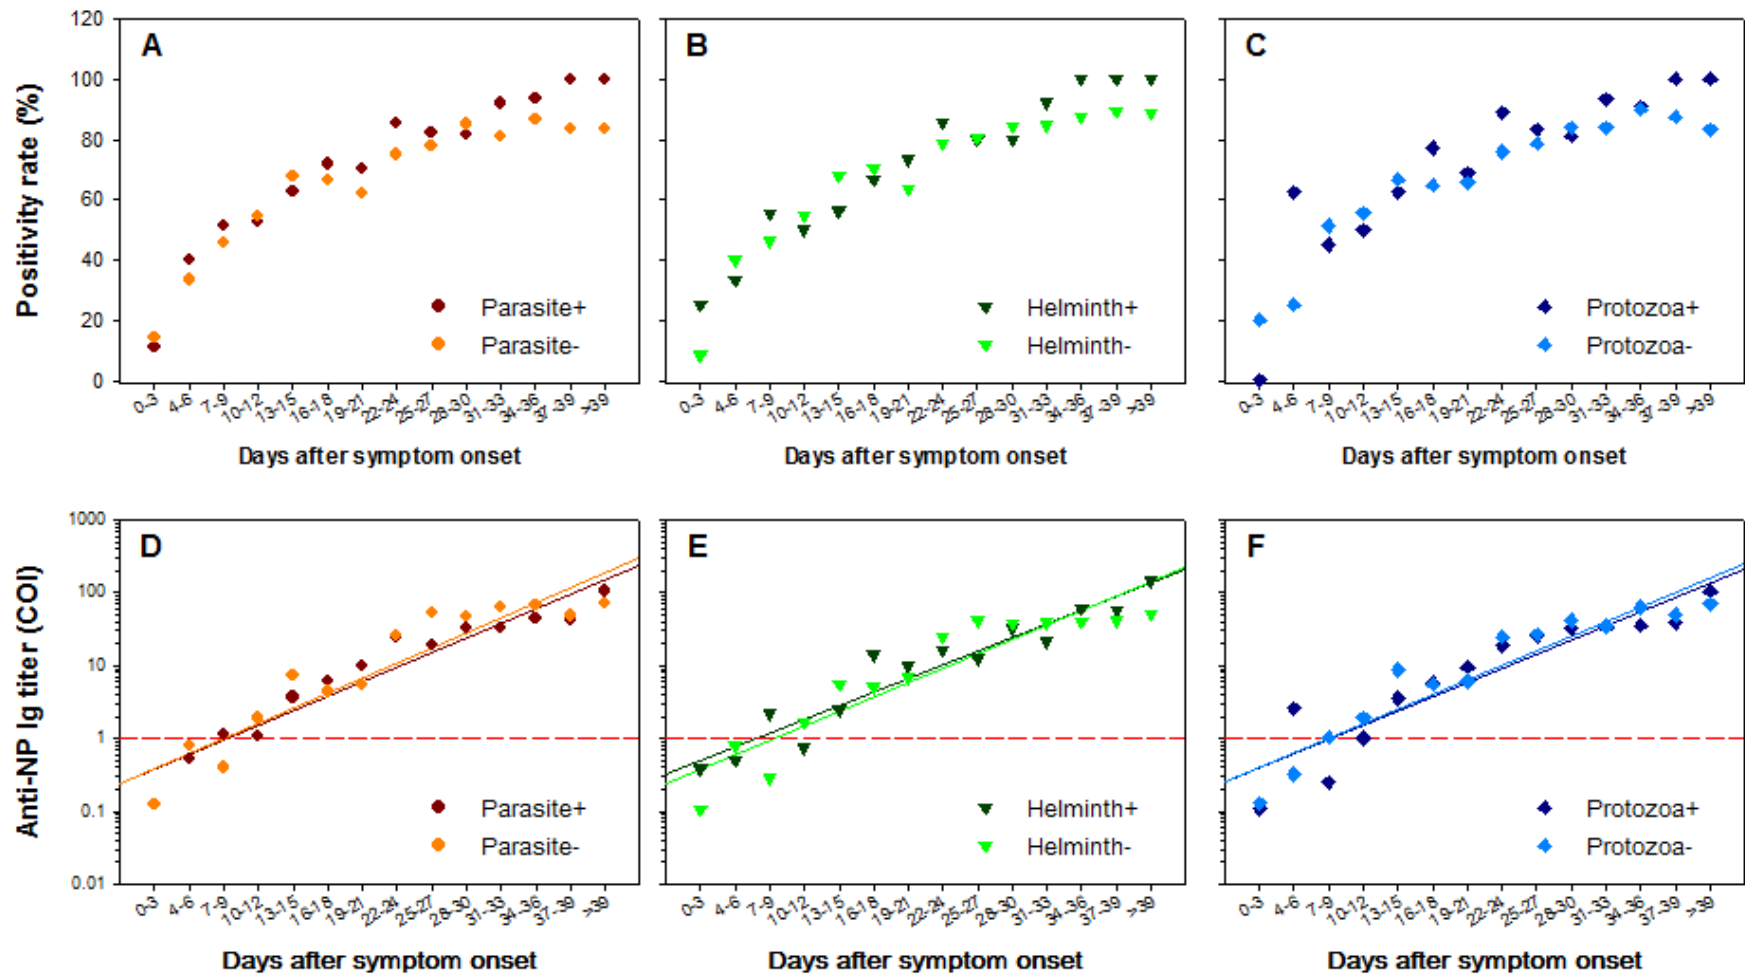

382



383 **Figure 1.** Anti-NP total Ig positivity rate (A-C) and titer levels (D-F) at different time points after onset of symptoms stratified by the  
384 parasite (A, D), helminth (B, E) and protozoa (C, F) co-infection status. The red dashed horizontal line (D-F) represents the cut-off value  
385 of the limit of detection of the anti-NP total Ig assay.

386

387

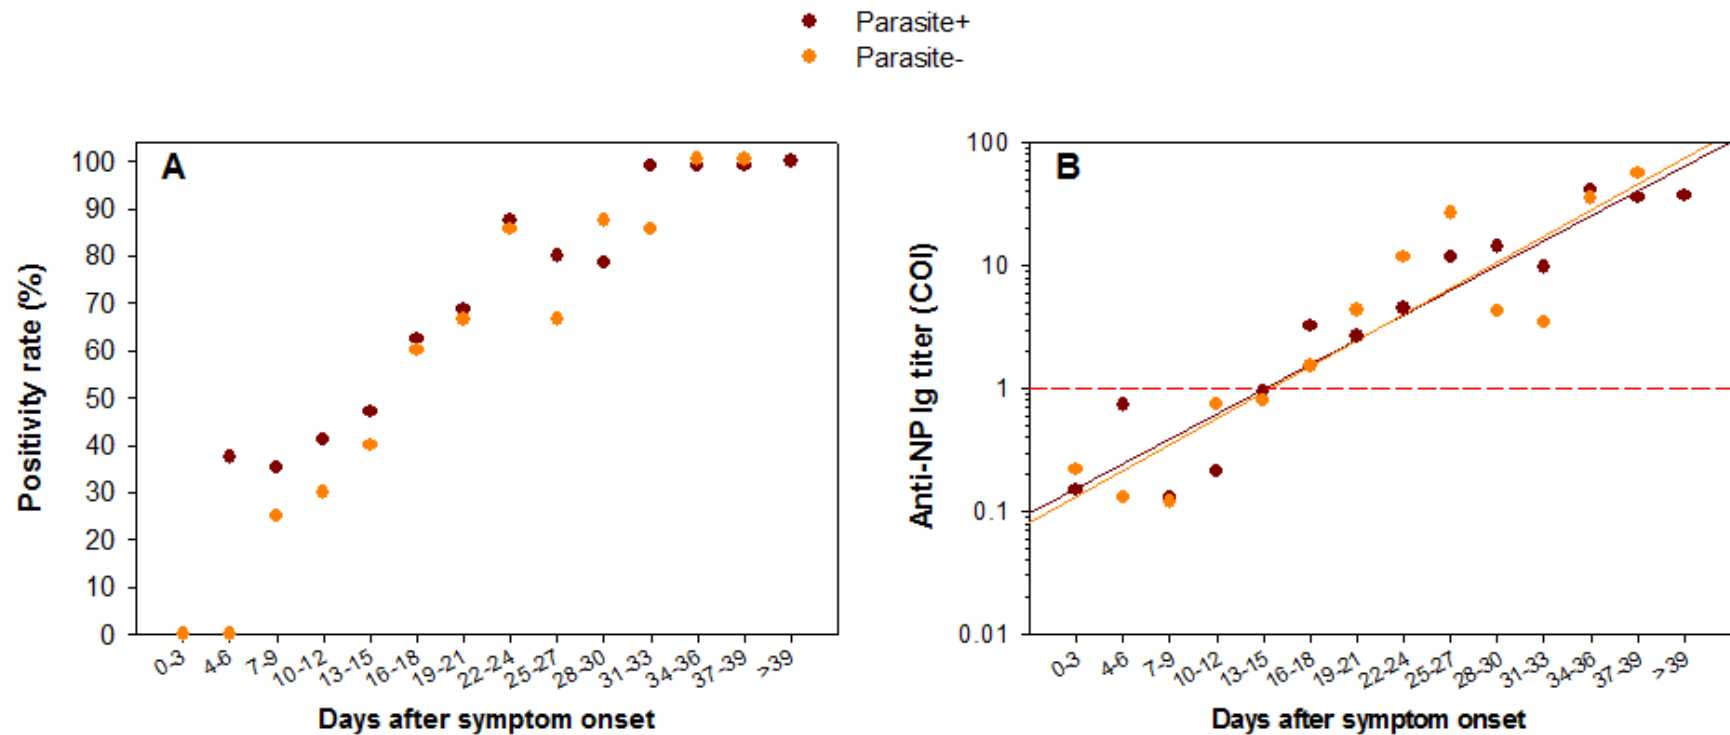

388

389 **Figure 2.** Seroconversion rate (A) and titers levels (B) of anti-NP total Ig at different time points after onset of symptoms stratified by  
390 parasite co-infection status. The red dashed horizontal line (B) represents the cut-off value of the limit of detection of the anti-NP total  
391 Ig assay.

392

393

394

395
